# Supplementary material
Source: HighWire-hosted journal article supplement (https://bmjopen.bmj.com/content/12/8/e057375)
Supplement: inline-supplementary-material-1 [file inline-supplementary-material-1.pdf]

# Supplementary Material

**Supplementary Figure 1.** Troponin variation trajectories (latent classes) categorization. Latent classes (LCA) are categorized as follow: 1: represent stable troponin, 2: represent increasing troponin and 3: represent decreasing troponin trend.

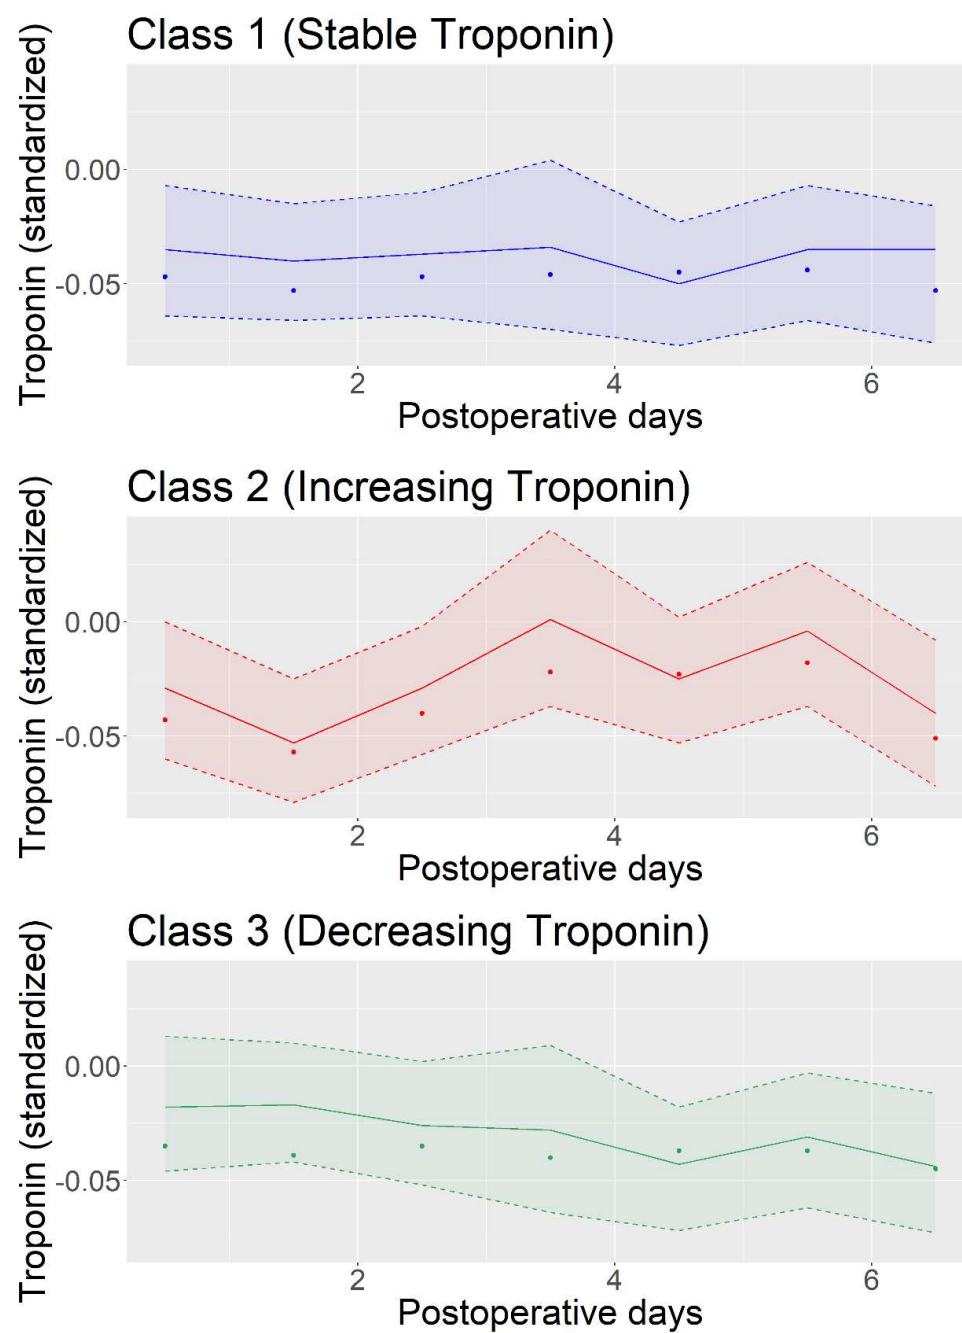

**Supplementary Table 1.** Variables associated with in-hospital mortality in univariate survival analysis.

| Variables                                      | HR    | 95% CI inferior tail | 95% CI superior tail | p-value |
|------------------------------------------------|-------|----------------------|----------------------|---------|
| Total bilirubin (per-1- $\mu$ mol/L increase)  | 1.05  | 1.02                 | 1.08                 | < 0.001 |
| C-reactive protein (per-1-mg/mL increase)      | 1.01  | 1.01                 | 1.01                 | < 0.001 |
| Troponin (per-1-ng/mL increase)                | 1.01  | 1.01                 | 1.01                 | < 0.001 |
| Peak troponin (per-1-ng/mL increase)           | 1.01  | 1.01                 | 1.01                 | < 0.001 |
| Creatinine (per-1- $\mu$ mol/L increase)       | 1.01  | 1.01                 | 1.01                 | < 0.001 |
| Peak creatinine (per-1- $\mu$ mol/L increase)  | 1.02  | 1.02                 | 1.03                 | < 0.001 |
| Urgent surgery                                 | 7.43  | 4.32                 | 12.78                | < 0.001 |
| Unprogrammed surgery                           | 2.33  | 1.53                 | 3.55                 | < 0.001 |
| Rescue surgery                                 | 73.58 | 13.41                | 403.74               | < 0.001 |
| Mitral valve replacement                       | 2.21  | 1.40                 | 3.49                 | < 0.001 |
| EuroScore 2 (per-1-unit increase)              | 1.10  | 1.02                 | 1.18                 | 0.011   |
| Age (per-1-unit increase)                      | 1.05  | 1.03                 | 1.07                 | < 0.001 |
| Moderate LV dysfunction (LVEF 31-50%)          | 1.85  | 1.19                 | 2.85                 | 0.006   |
| Critical LV dysfunction (LVEF < 20%)           | 12.78 | 3.06                 | 53.36                | < 0.001 |
| Redux                                          | 2.95  | 2.29                 | 3.80                 | < 0.001 |
| Severe AKI                                     | 2.45  | 1.66                 | 3.62                 | < 0.001 |
| Severe pulmonary hypertension                  | 2.26  | 1.31                 | 3.89                 | 0.003   |
| Recent myocardial infarction                   | 2.30  | 1.52                 | 5.79                 | 0.001   |
| Angina                                         | 6.33  | 1.56                 | 25.78                | 0.01    |
| Thoracic aorta surgery                         | 2.36  | 1.27                 | 4.39                 | 0.007   |
| Preoperative critical state                    | 21.20 | 13.77                | 32.64                | < 0.001 |
| NYHA 3                                         | 1.58  | 1.03                 | 2.43                 | 0.036   |
| NYHA 4                                         | 6.57  | 3.35                 | 12.90                | < 0.001 |
| 2 non-CABG associated procedures               | 1.61  | 1.06                 | 2.46                 | 0.026   |
| 3 non-CABG associated procedures               | 2.71  | 1.10                 | 6.68                 | 0.030   |
| Post-infarction interventricular communication | 9.46  | 2.72                 | 32.95                | < 0.001 |

Abbreviations : HR : hazard ratio ; CI : confidence interval ; LVEF : left ventricular ejection fraction; CABG: coronary artery bypass graft; AKI: acute kidney injury

**Supplementary Table 2.** Sensitivity, specificity, positive and negative predictive values associated with other thresholds of troponin levels, regarding in-hospital mortality.

Troponin<sub>XXN</sub> refers to XX-times upper normal troponin value.

|                          | Sensitivity | Specificity | Positive predictive value | Negative predictive value |
|--------------------------|-------------|-------------|---------------------------|---------------------------|
| Troponin <sub>200N</sub> | 66.06%      | 75.85%      | 7.37%                     | 98.72%                    |
| Troponin <sub>500N</sub> | 44.04%      | 90.82%      | 12.24%                    | 98.24%                    |

**Supplementary Table 3.** Multivariable analysis assessing the association between 200-times normal troponin threshold and in-hospital mortality.

|                             | Univariate analysis<br>HR (95% IC) | Multivariate analysis<br>HR (95% IC) | p       |
|-----------------------------|------------------------------------|--------------------------------------|---------|
| >Troponin <sub>200N</sub>   | 1.46 (1.33 – 1.60)                 | 1.75 (1.57 – 1.94)                   | < 0.001 |
| Redux                       | 2.95 (2.29 – 3.80)                 | 1.12 (0.99 – 1.40)                   | 0.07    |
| Preoperative critical state | 21.20 (13.77 – 32.64)              | 5.86 (4.93 – 6.98)                   | < 0.001 |
| Creatinine                  | 1.03 (1.03 – 1.04)                 | 1.02 (1.01 – 1.03)                   | < 0.001 |

**Supplementary Table 4.** Multivariable analysis assessing the association between 500-times normal troponin threshold and in-hospital mortality.

|                             | Univariate analysis<br>HR (95% IC) | Multivariate analysis<br>HR (95% IC) | p       |
|-----------------------------|------------------------------------|--------------------------------------|---------|
| >Troponin <sub>500N</sub>   | 1.68 (1.52 – 1.86)                 | 1.57 (1.41 – 1.75)                   | < 0.001 |
| Redux                       | 2.95 (2.29 – 3.80)                 | 0.98 (0.83 – 1.17)                   | 0.84    |
| Preoperative critical state | 21.20 (13.77 – 32.64)              | 4.08 (3.40 – 4.88)                   | < 0.001 |
| Creatinine                  | 1.03 (1.03 – 1.04)                 | 1.03 (1.02 – 1.04)                   | < 0.001 |
